# Supplementary material for: Benzofuran–stilbene hybrid compounds: an antioxidant assessment – a DFT study
Source: Royal Society of Chemistry journal article supplement (doi:10.1039/d1ra01076j), 2021-01-01
Supplement: d1ra01076j1.pdf [file d1ra01076j1.pdf]

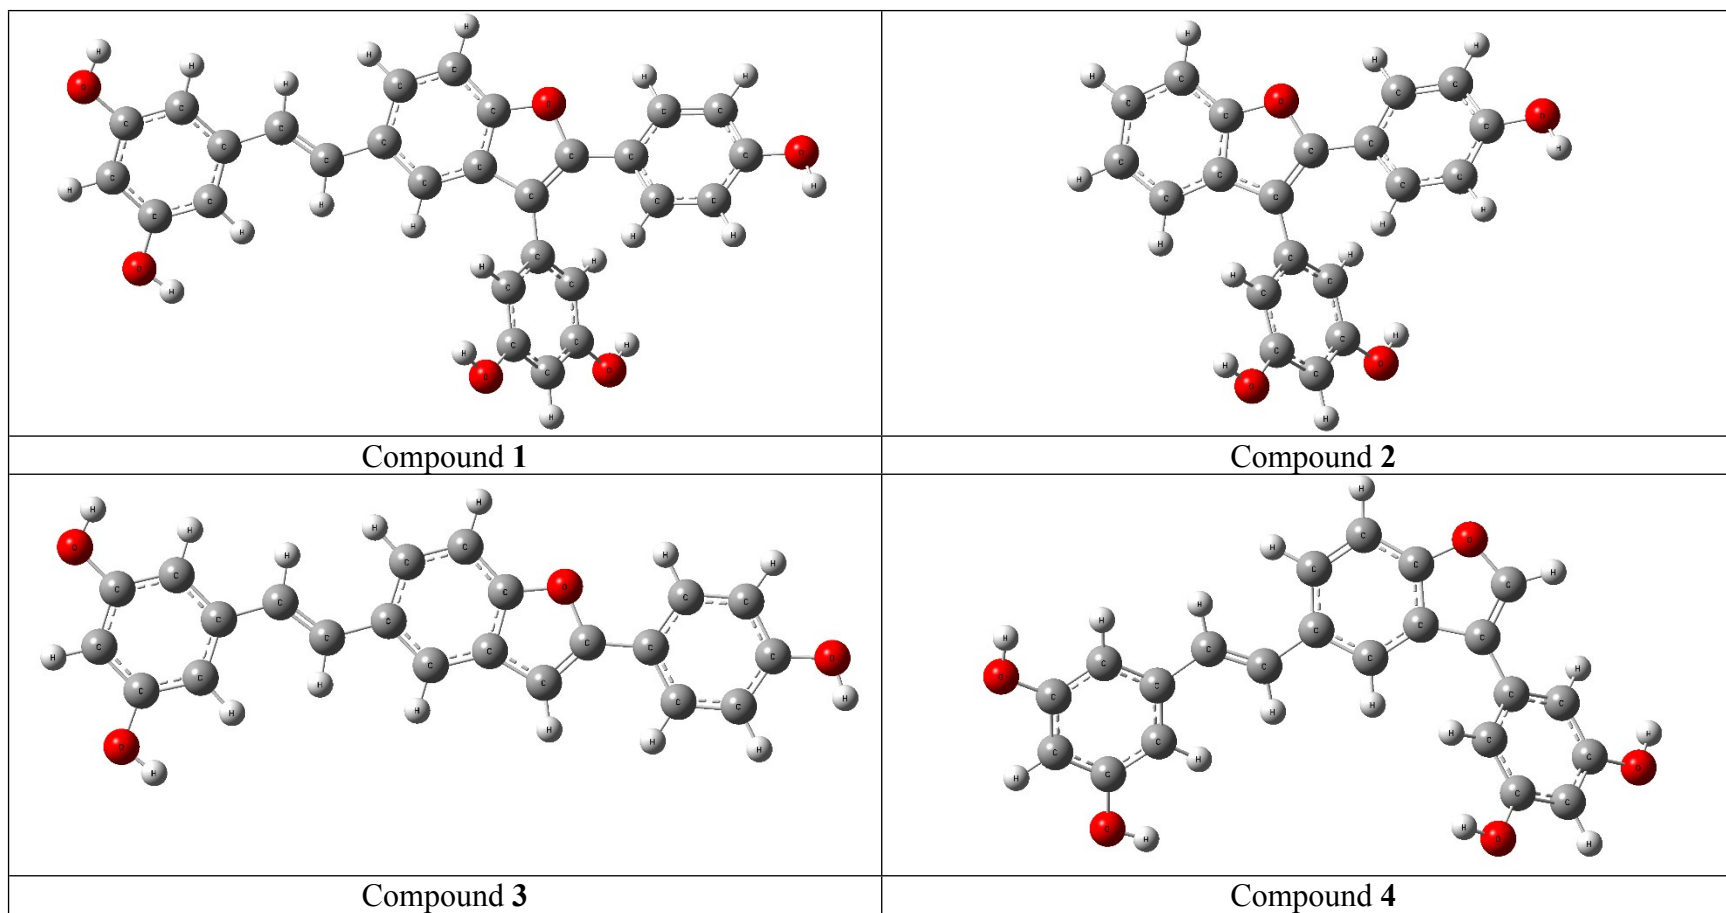

**Fig. S1.** The state forms of studied compounds 1-4 in studied media at B3LYP/6-311G(d,p) level of theory

|                                                                                    |                                                                                     |                                                                                      |                                                                                      |
|------------------------------------------------------------------------------------|-------------------------------------------------------------------------------------|--------------------------------------------------------------------------------------|--------------------------------------------------------------------------------------|
| 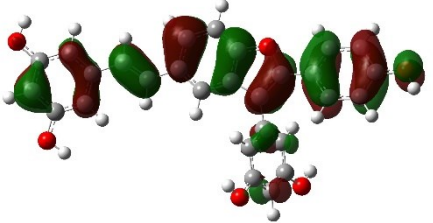  |   |   |   |
| HOMO-neutral (1)                                                                   | HOMO-neutral (2)                                                                    | HOMO-neutral (3)                                                                     | HOMO-neutral (4)                                                                     |
|   |   |   |   |
| LUMO-neutral (1)                                                                   | LUMO-neutral (2)                                                                    | LUMO-neutral (3)                                                                     | LUMO-neutral (4)                                                                     |
|  |  |  |  |
| HOMO-4'-OH radical (1)                                                             | HOMO-3''-OH radical (1)                                                             | HOMO-5'''-OH radical (1)                                                             | HOMO-3'''-OH radical (1)                                                             |

|                                                                                     |                                                                                      |                                                                                       |                                                                                       |
|-------------------------------------------------------------------------------------|--------------------------------------------------------------------------------------|---------------------------------------------------------------------------------------|---------------------------------------------------------------------------------------|
| 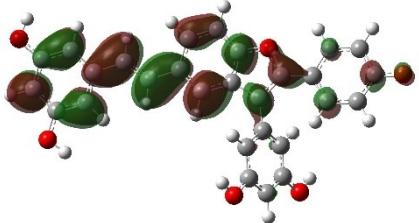   |    |    |    |
| LUMO-4'-OH radical (1)                                                              | LUMO-3''-OH radical (1)                                                              | LUMO-5''-OH radical (1)                                                               | LUMO-3'''-OH radical (1)                                                              |
|    |    |    |    |
| HOMO-5'''-OH radical (1)                                                            | HOMO-4'-OH radical (2)                                                               | HOMO-3''-OH radical (2)                                                               | HOMO-5''-OH radical (2)                                                               |
|   |   |   |   |
| LUMO-5'''-OH radical (1)                                                            | LUMO-4'-OH radical (2)                                                               | LUMO-3''-OH radical (2)                                                               | LUMO-5''-OH radical (2)                                                               |
|  |  |  |  |
| HOMO-4'-OH radical (3)                                                              | HOMO-3'''-OH radical (3)                                                             | HOMO-5'''-OH radical (3)                                                              | HOMO-3''-OH radical (4)                                                               |

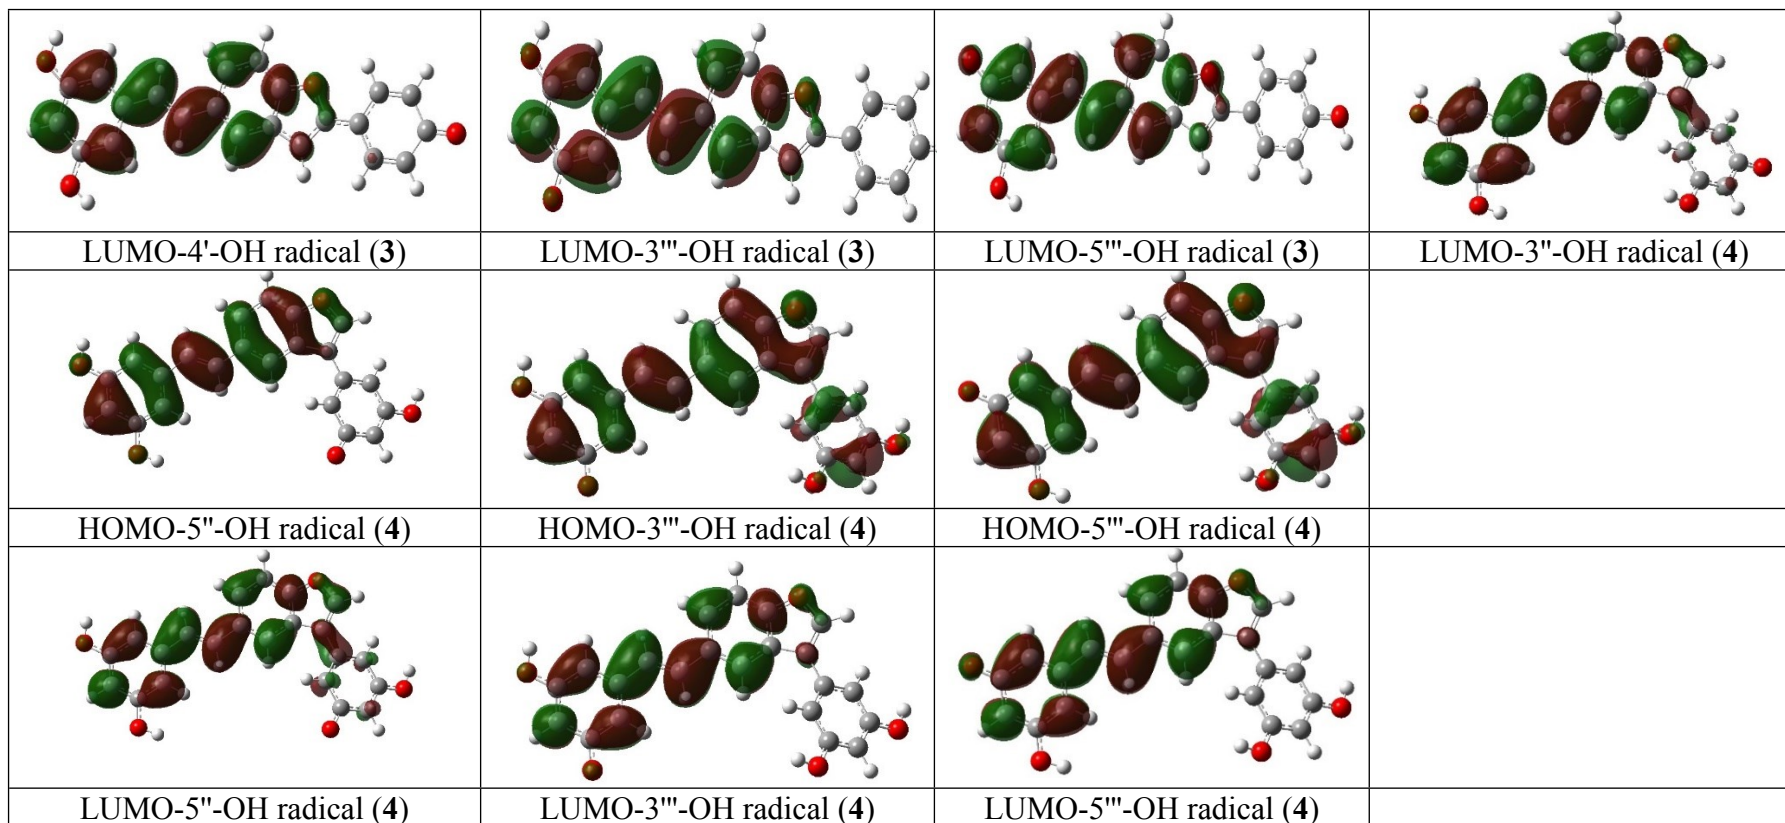

**Fig. S2.** HOMO and LUMO images of neutral and radical forms of compounds 1-4 in all studied mediums at B3LYP/6-311G(d,p) level of theory

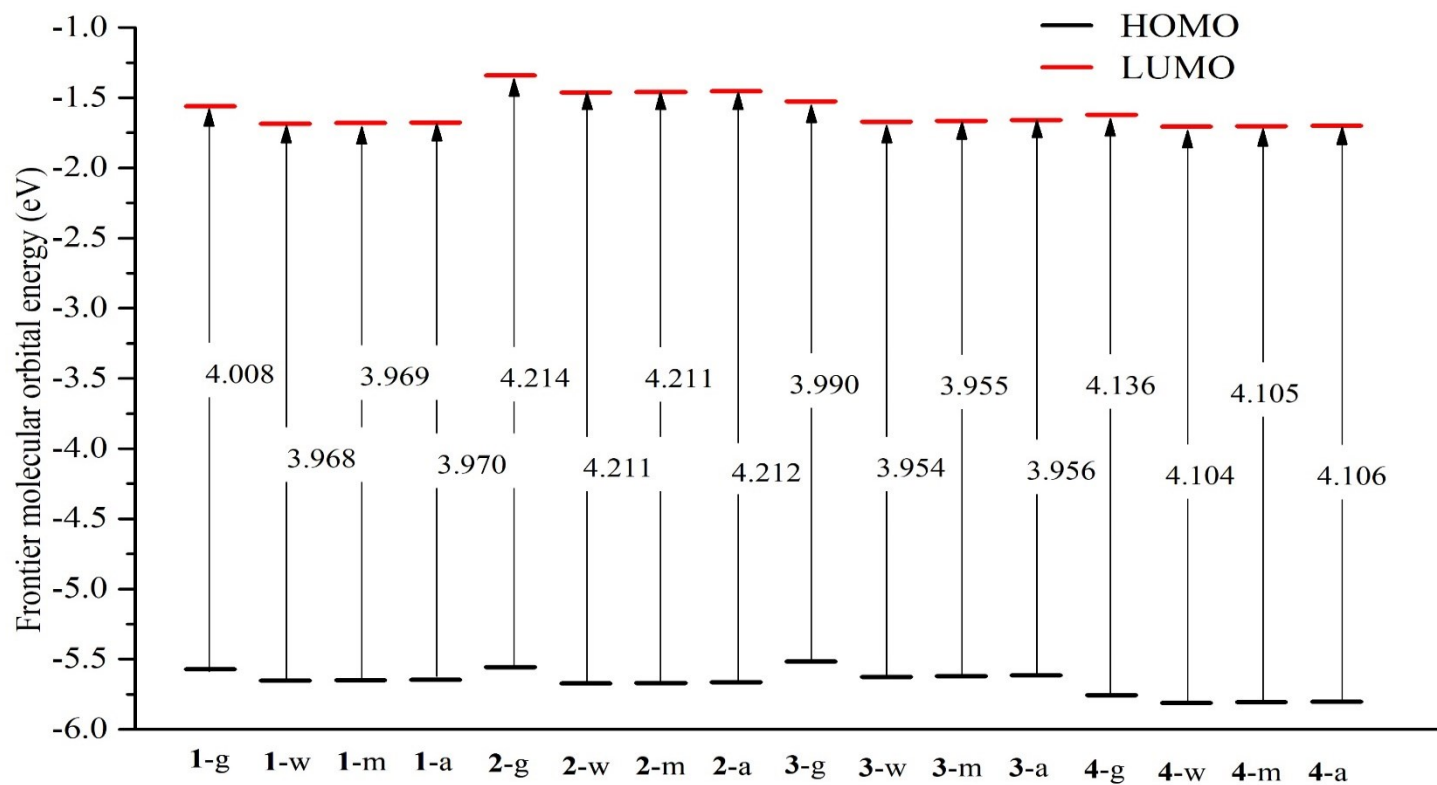

**Fig. S3.**  $E_{\text{gap}} = E_{\text{L}} - E_{\text{H}}$  of the neutral structures **1-4** in four studied mediums at B3LYP/6-311G(d,p) level of theory

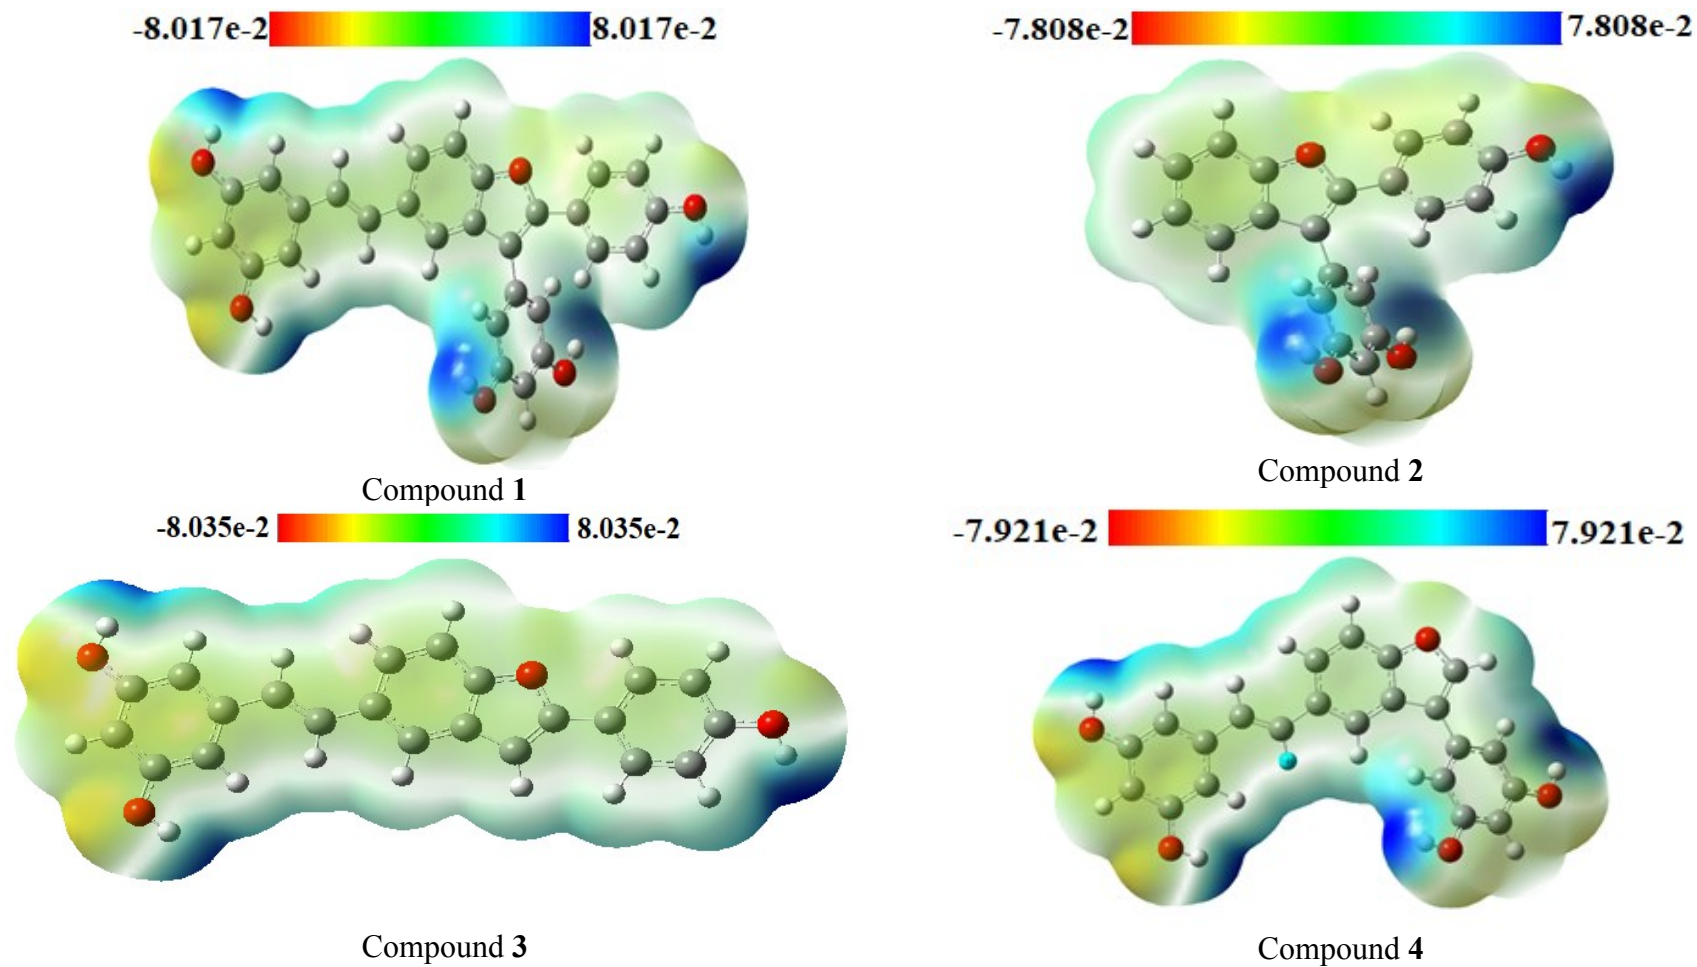

**Fig. S4.** Molecular electrostatic potential map on the isodensity surfaces in gaseous phase at B3LYP/6-311G(d,p) level of theory

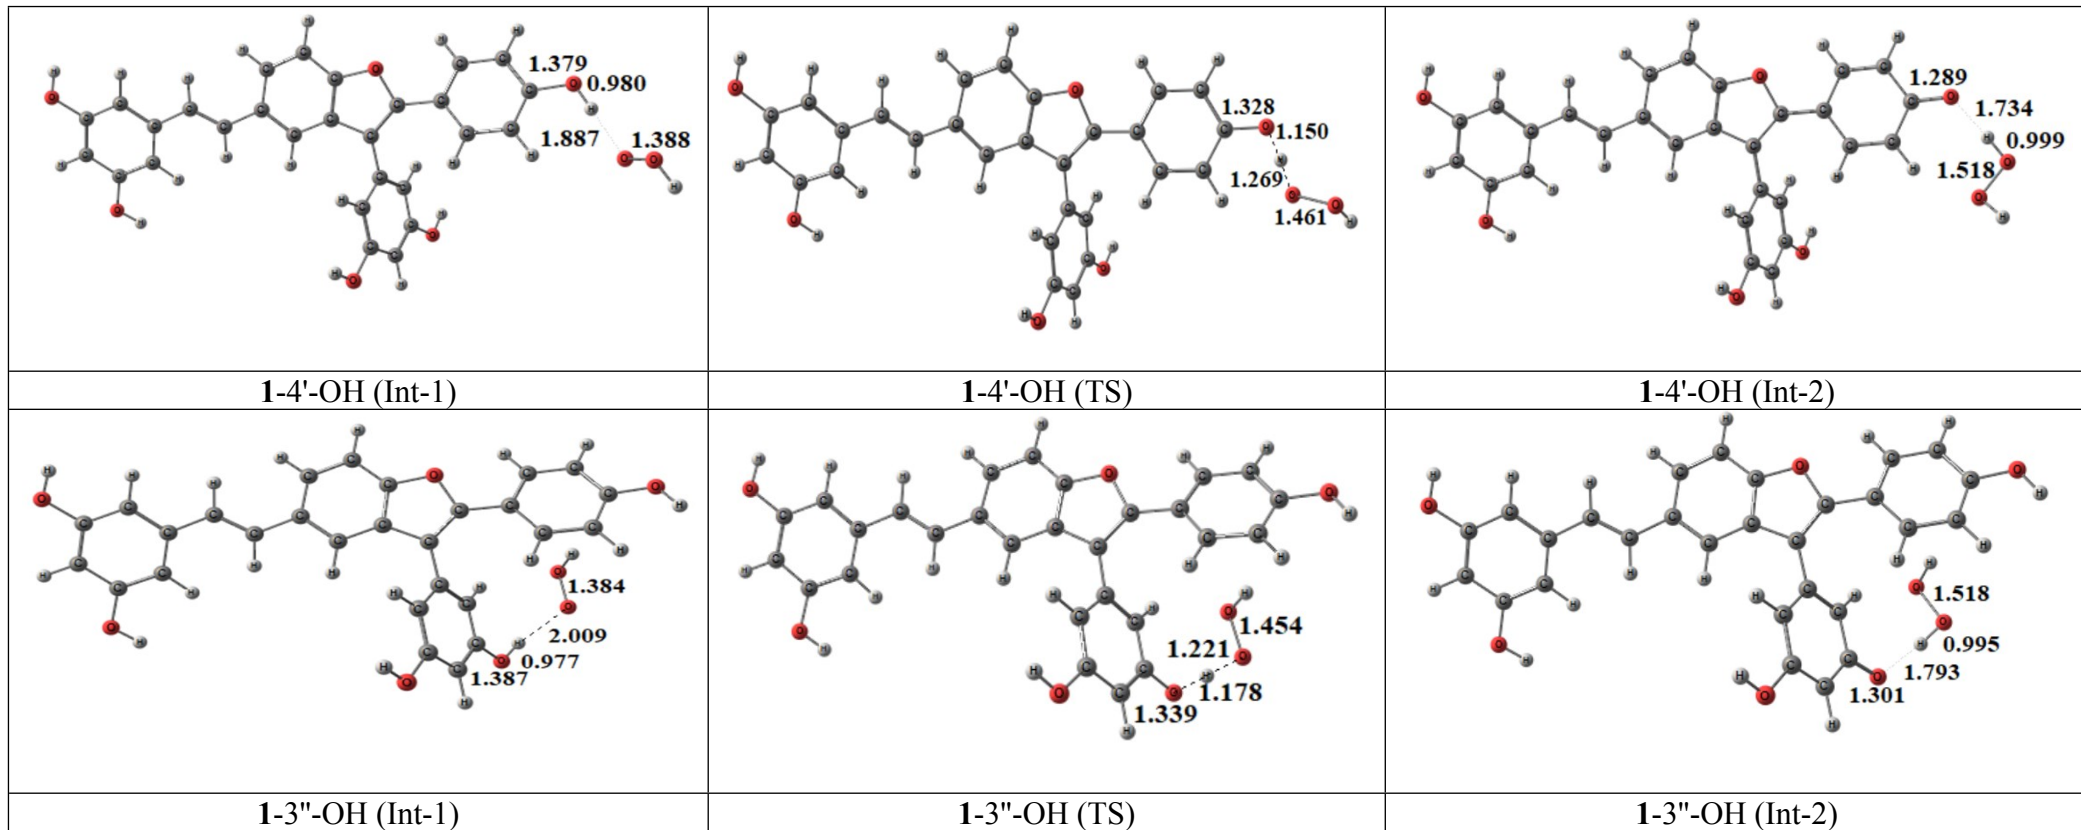

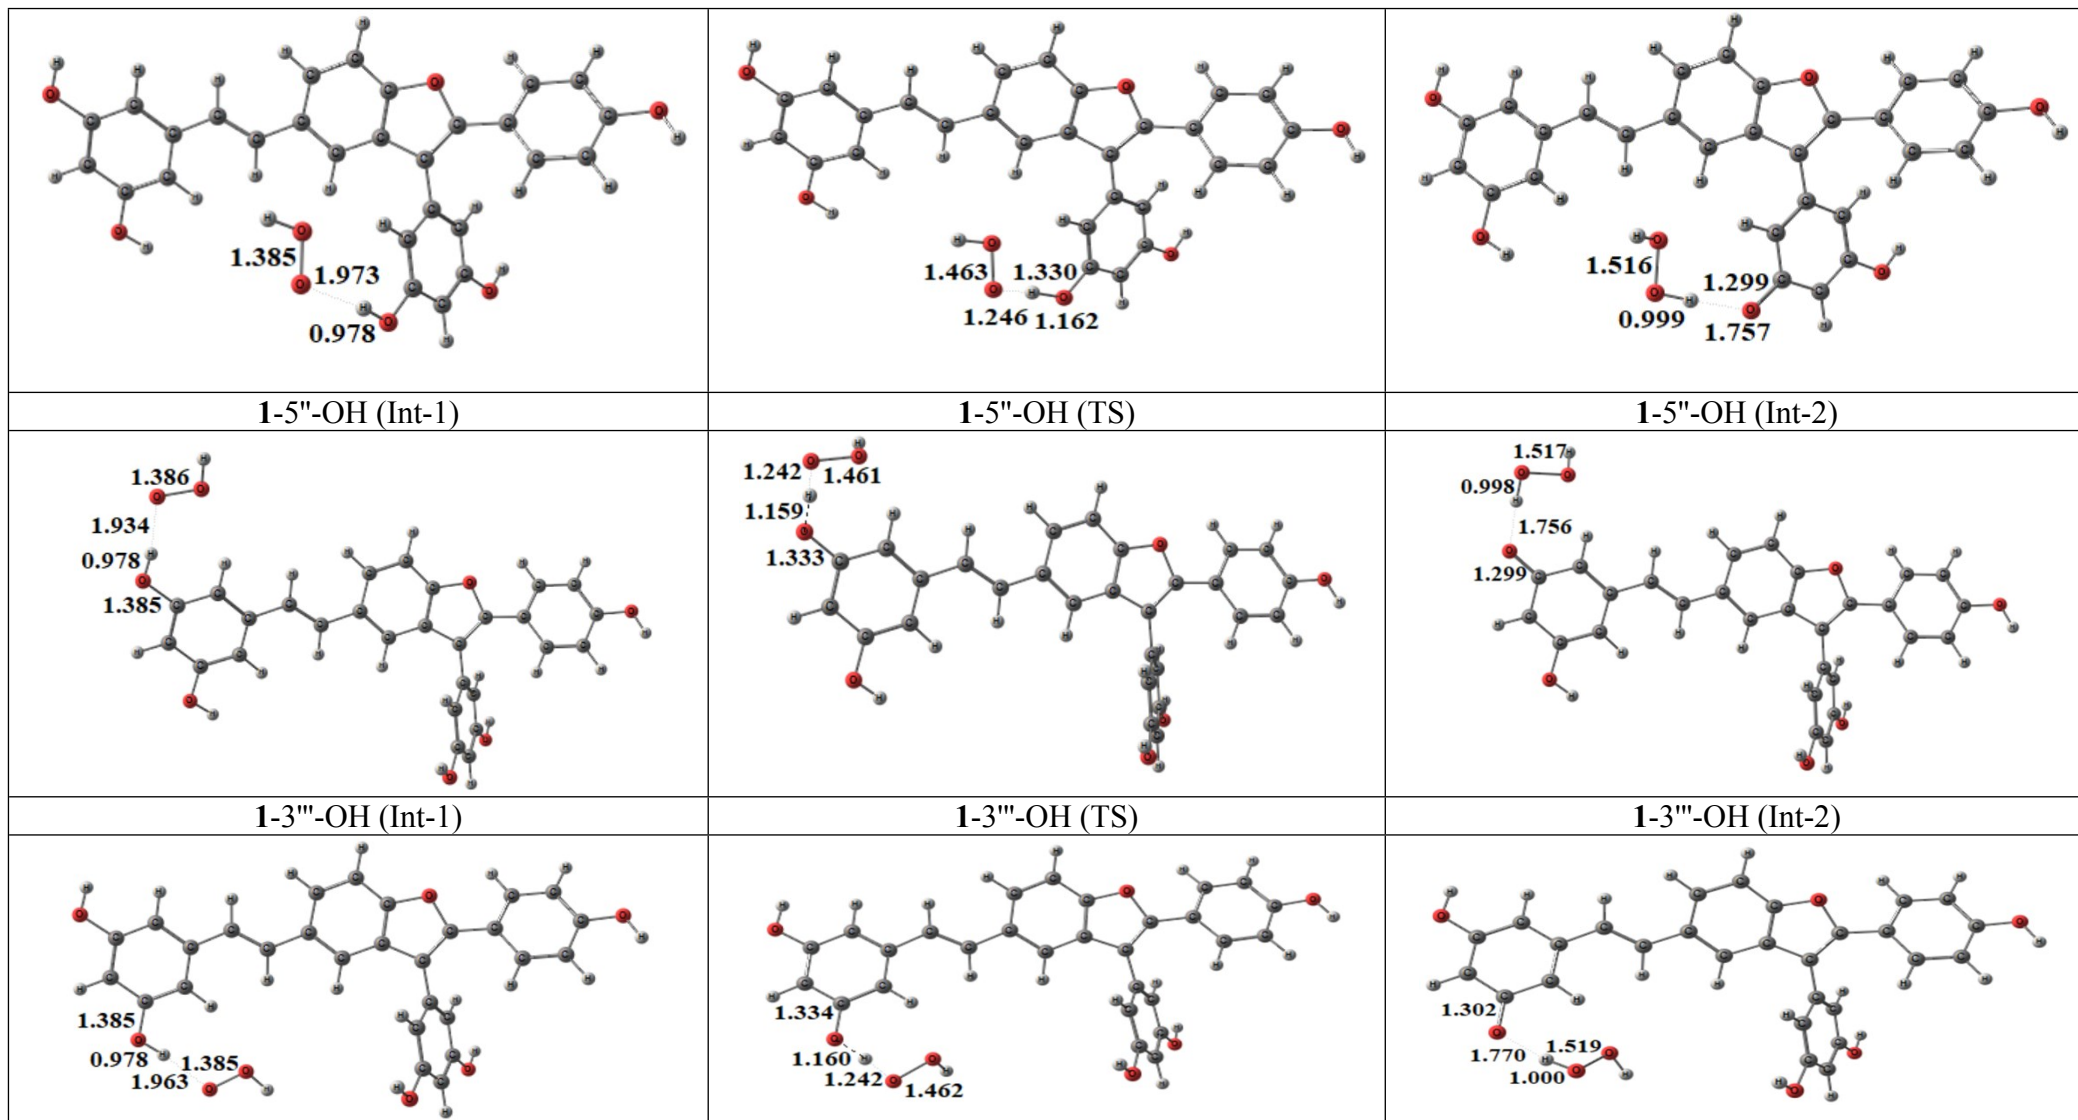



|                                                                                   |                                                                                    |                                                                                     |
|-----------------------------------------------------------------------------------|------------------------------------------------------------------------------------|-------------------------------------------------------------------------------------|
| <p>1-5'''-OH (Int-1)</p>                                                          | <p>1-5'''-OH (TS)</p>                                                              | <p>1-5'''-OH (Int-2)</p>                                                            |
| 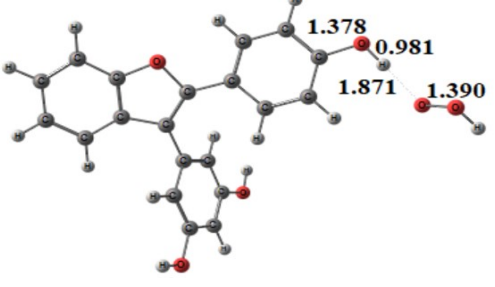 |  |  |
| <p>2-4'-OH (Int-1)</p>                                                            | <p>2-4'-OH (TS)</p>                                                                | <p>2-4'-OH (Int-2)</p>                                                              |
|  |  |  |
| <p>2-3''-OH (Int-1)</p>                                                           | <p>2-3''-OH (TS)</p>                                                               | <p>2-3''-OH (Int-2)</p>                                                             |

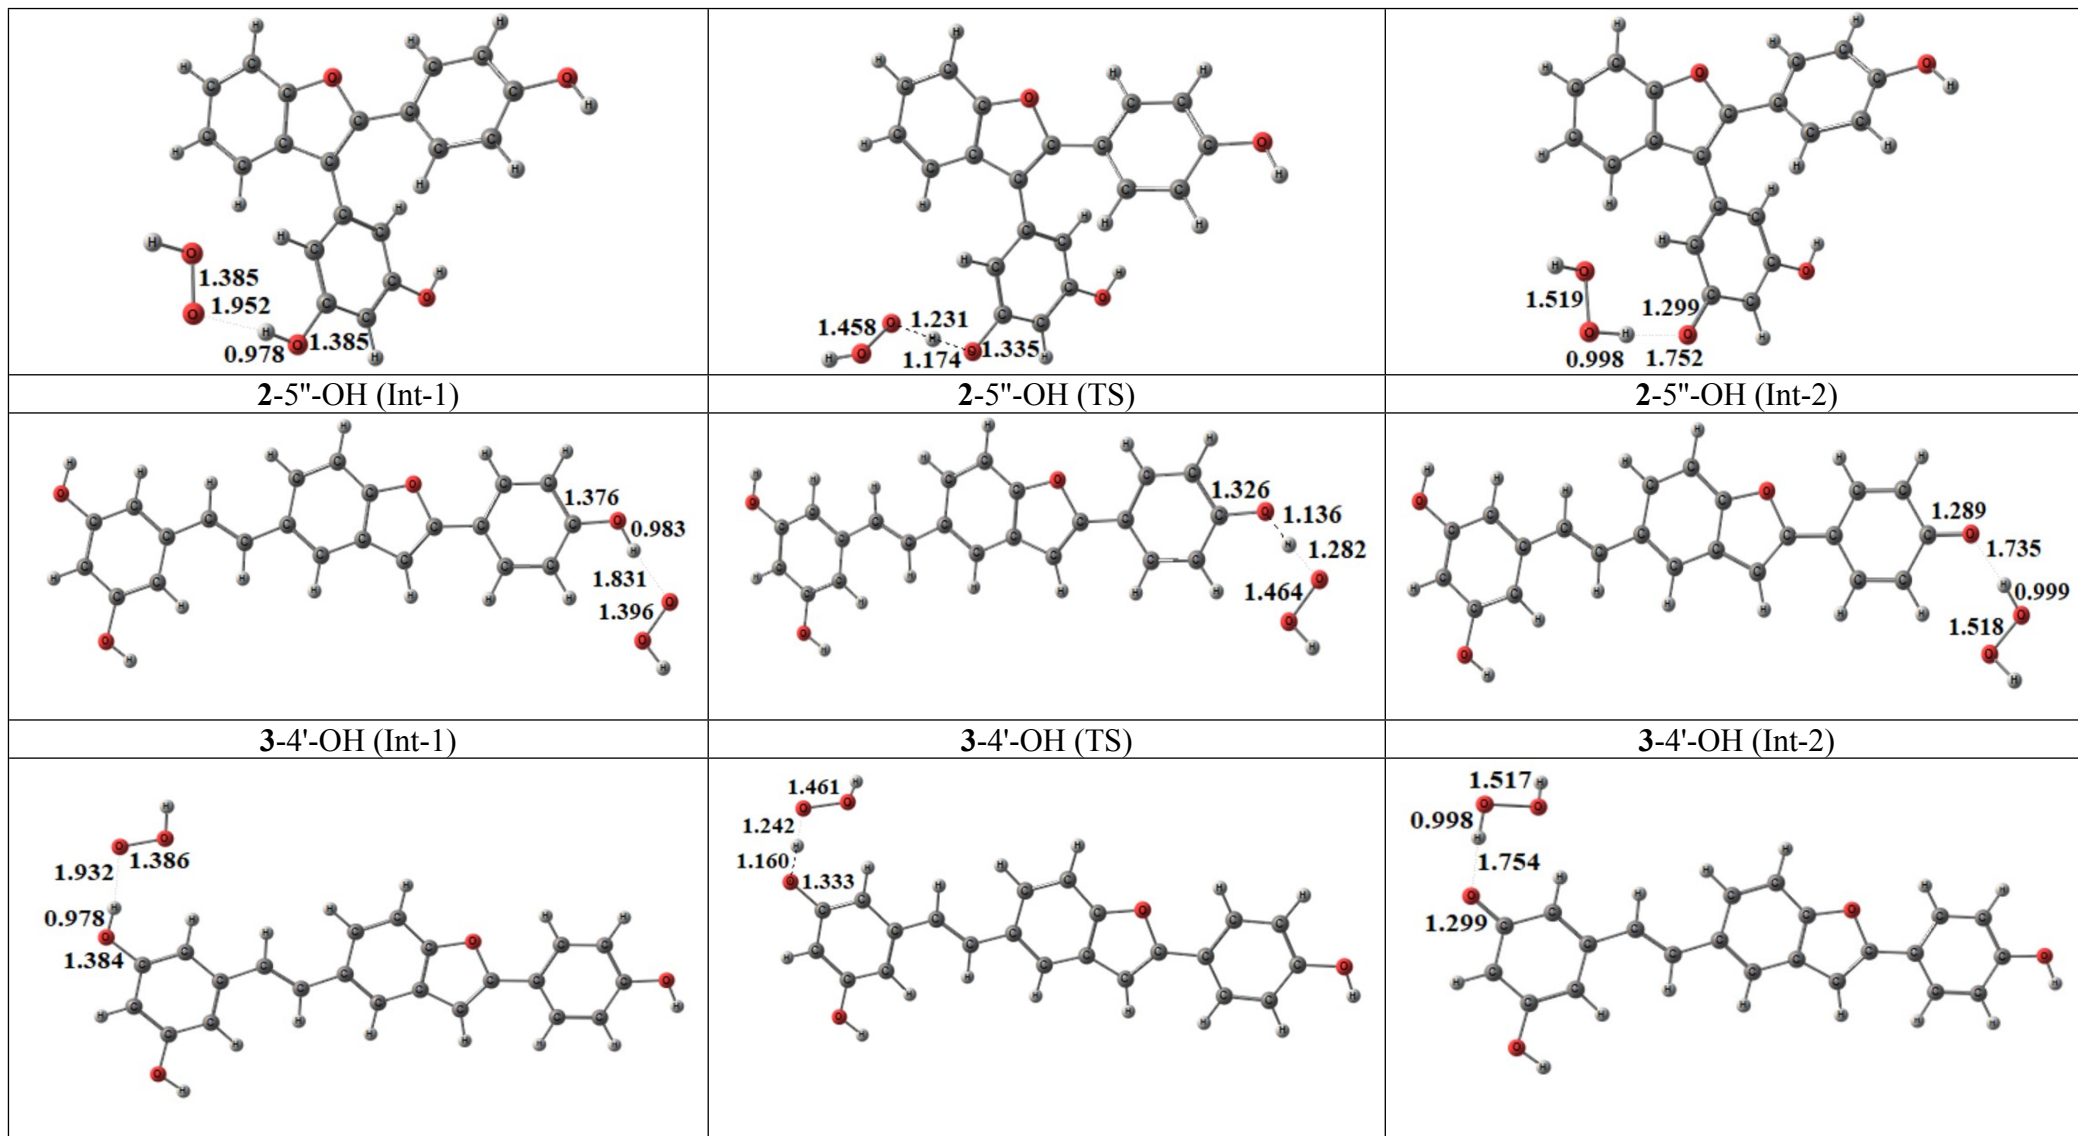

|                                                                                   |                                                                                    |                                                                                     |
|-----------------------------------------------------------------------------------|------------------------------------------------------------------------------------|-------------------------------------------------------------------------------------|
| <p>3-3'''-OH (Int-1)</p>                                                          | <p>3-3'''-OH (TS)</p>                                                              | <p>3-3'''-OH (Int-2)</p>                                                            |
| 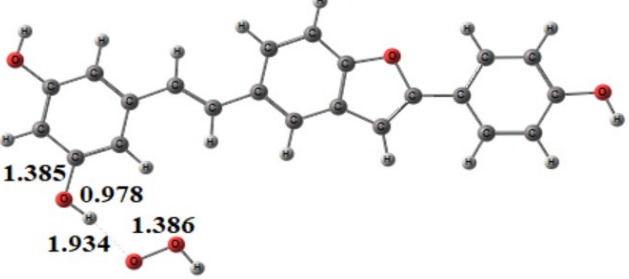 |  |  |
| <p>3-5'''-OH (Int-1)</p>                                                          | <p>3-5'''-OH (TS)</p>                                                              | <p>3-5'''-OH (Int-2)</p>                                                            |
|  |  |  |
| <p>4-3'''-OH (Int-1)</p>                                                          | <p>4-3'''-OH (TS)</p>                                                              | <p>4-3'''-OH (Int-2)</p>                                                            |

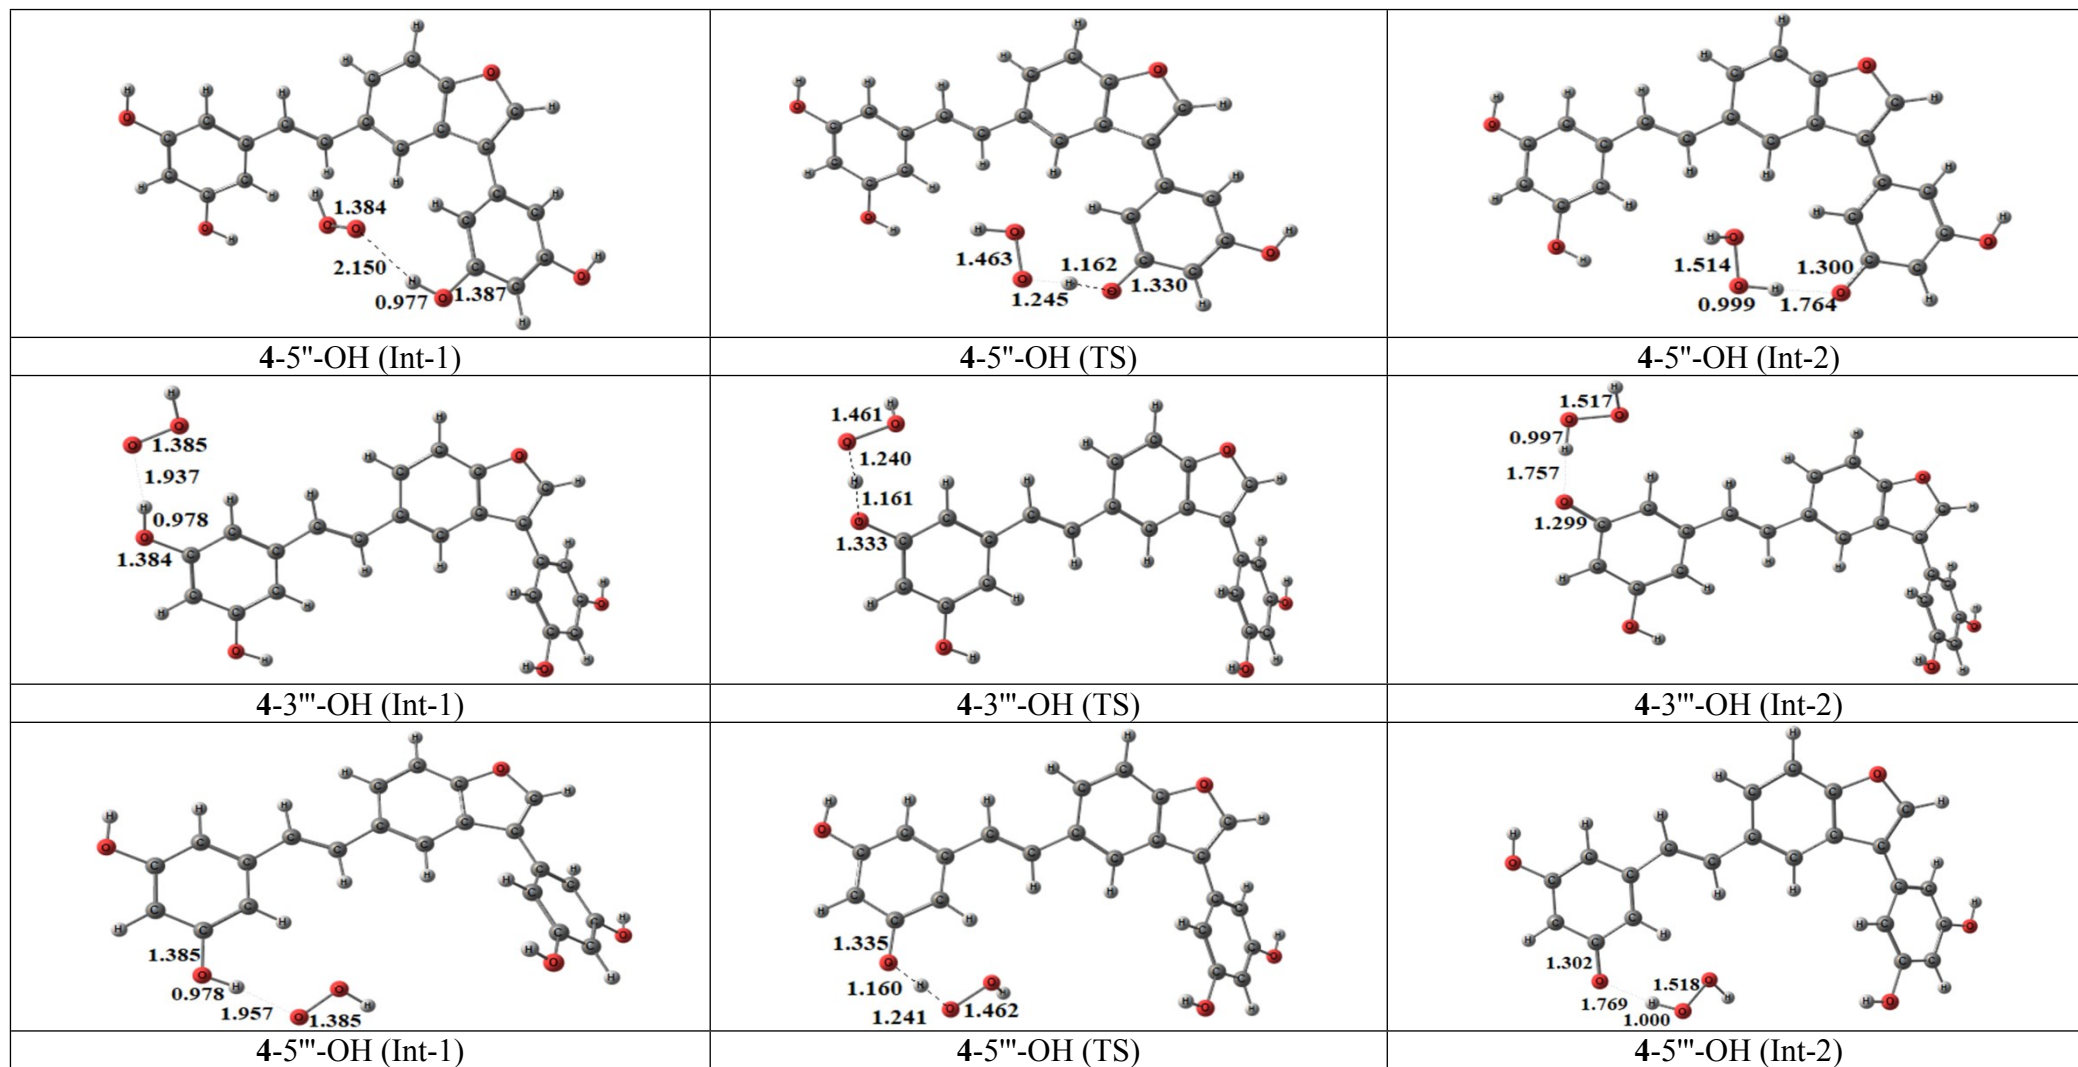

**Fig. S5.** The optimized structures of intermediates and transition states of HOO<sup>•</sup> attack to the compounds **1-4** at B3LYP/6-311G(d,p) level

**Table S1** Optimized bond distances and dihedral angles ( $\theta$ ) of studied compounds **1-4** in mediums gas, methanol, water and acetone at B3LYP/6-311G(d,p) level of theory

| No |          | Bond lengths |           |           |            |            | Dihedral angles                     |                                       |
|----|----------|--------------|-----------|-----------|------------|------------|-------------------------------------|---------------------------------------|
|    |          | 4' (O-H)     | 3'' (O-H) | 5'''(O-H) | 3''''(O-H) | 5''''(O-H) | $\theta_{11}(\text{C3-C2-C1'-C2'})$ | $\theta_{12}(\text{C2-C3-C1''-C2''})$ |
| 1  | Gas      | 0.963        | 0.963     | 0.963     | 0.963      | 0.963      | -22.0                               | -57.3                                 |
|    | Water    | 0.965        | 0.964     | 0.964     | 0.964      | 0.964      | -24.7                               | -55.0                                 |
|    | Methanol | 0.965        | 0.964     | 0.964     | 0.964      | 0.964      | -24.6                               | -55.2                                 |
|    | Acetone  | 0.965        | 0.964     | 0.964     | 0.964      | 0.964      | -24.4                               | -55.4                                 |
| 2  | Gas      | 0.963        | 0.963     | 0.963     |            |            | -21.4                               | -57.9                                 |
|    | Water    | 0.965        | 0.965     | 0.964     |            |            | -23.8                               | -55.3                                 |
|    | Methanol | 0.965        | 0.964     | 0.964     |            |            | -23.8                               | -55.4                                 |
|    | Acetone  | 0.965        | 0.964     | 0.964     |            |            | -23.7                               | -55.5                                 |
| 3  | Gas      | 0.963        |           |           | 0.963      | 0.963      | 0.0                                 |                                       |
|    | Water    | 0.965        |           |           | 0.965      | 0.965      | 0.0                                 |                                       |
|    | Methanol | 0.965        |           |           | 0.965      | 0.965      | 0.0                                 |                                       |
|    | Acetone  | 0.965        |           |           | 0.965      | 0.965      | 0.0                                 |                                       |
| 4  | Gas      |              | 0.963     | 0.963     | 0.963      | 0.963      |                                     | -42.8                                 |
|    | Water    |              | 0.965     | 0.964     | 0.964      | 0.964      |                                     | -38.1                                 |
|    | Methanol |              | 0.965     | 0.964     | 0.964      | 0.964      |                                     | -38.7                                 |
|    | Acetone  |              | 0.965     | 0.964     | 0.964      | 0.964      |                                     | -39.1                                 |

**Table S2** The optimized energies versus torsional angles ( $\theta$ ) at B3LYP/6-311G(d) level of theory

| Degree | $\theta_{11}(\text{C3-C2-C1'-C2'})$ |                          | $\theta_{12}(\text{C2-C3-C1''-C2''})$ |                          | $\theta_{11}(\text{C3-C2-C1'-C2'})$ |                          | $\theta_{12}(\text{C2-C3-C1''-C2''})$ |                          |
|--------|-------------------------------------|--------------------------|---------------------------------------|--------------------------|-------------------------------------|--------------------------|---------------------------------------|--------------------------|
|        | Compound 1<br>(au)                  | $\Delta E$<br>(kcal/mol) | Compound 1<br>(au)                    | $\Delta E$<br>(kcal/mol) | Compound 2<br>(au)                  | $\Delta E$<br>(kcal/mol) | Compound 2<br>(au)                    | $\Delta E$<br>(kcal/mol) |
| -180   | -1530.742395                        | 0.40                     | -1530.732391                          | <b>6.68</b>              | -1071.723044                        | 0.39                     | -1071.713396                          | <b>6.44</b>              |
| -170   | -1530.742799                        | 0.15                     | -1530.735894                          | 4.48                     | -1071.723433                        | 0.14                     | -1071.716714                          | 4.36                     |
| -160   | -1530.743036                        | <b>0.00</b>              | -1530.738923                          | 2.58                     | -1071.723661                        | <b>0.00</b>              | -1071.719716                          | 2.47                     |
| -150   | -1530.742762                        | 0.17                     | -1530.741127                          | 1.19                     | -1071.723385                        | 0.17                     | -1071.721833                          | 1.14                     |
| -140   | -1530.742092                        | 0.59                     | -1530.742367                          | 0.42                     | -1071.722752                        | 0.57                     | -1071.723073                          | 0.37                     |
| -130   | -1530.741009                        | 1.27                     | -1530.742965                          | 0.04                     | -1071.721622                        | 1.28                     | -1071.723604                          | 0.03                     |
| -120   | -1530.739643                        | 2.13                     | -1530.743029                          | <b>0.00</b>              | -1071.720278                        | 2.12                     | -1071.723656                          | <b>0.00</b>              |
| -110   | -1530.738174                        | 3.05                     | -1530.742781                          | 0.16                     | -1071.718813                        | 3.04                     | -1071.723423                          | 0.15                     |
| -100   | -1530.736816                        | 3.90                     | -1530.742505                          | 0.33                     | -1071.717482                        | 3.88                     | -1071.723126                          | 0.33                     |
| -90    | -1530.735946                        | 4.45                     | -1530.742381                          | <b>0.41</b>              | -1071.716584                        | 4.44                     | -1071.723039                          | <b>0.39</b>              |
| -80    | -1530.735661                        | <b>4.63</b>              | -1530.742552                          | 0.30                     | -1071.716318                        | <b>4.61</b>              | -1071.723177                          | 0.30                     |
| -70    | -1530.735995                        | 4.42                     | -1530.742826                          | 0.13                     | -1071.716607                        | 4.43                     | -1071.723465                          | 0.12                     |
| -60    | -1530.739955                        | 1.93                     | -1530.743029                          | <b>0.00</b>              | -1071.720596                        | 1.92                     | -1071.723656                          | <b>0.00</b>              |
| -50    | -1530.741287                        | 1.10                     | -1530.742904                          | 0.08                     | -1071.721911                        | 1.10                     | -1071.723558                          | 0.06                     |

|     |              |             |              |             |              |             |              |             |
|-----|--------------|-------------|--------------|-------------|--------------|-------------|--------------|-------------|
| -40 | -1530.742316 | 0.45        | -1530.742229 | 0.50        | -1071.722989 | 0.42        | -1071.722925 | 0.46        |
| -30 | -1530.742907 | 0.08        | -1530.740876 | 1.35        | -1071.723517 | 0.09        | -1071.721573 | 1.31        |
| -20 | -1530.743036 | <b>0.00</b> | -1530.738631 | 2.76        | -1071.723661 | <b>0.00</b> | -1071.719408 | 2.67        |
| -10 | -1530.742799 | 0.15        | -1530.735629 | 4.64        | -1071.723420 | 0.15        | -1071.716430 | 4.53        |
| 0   | -1530.742401 | <b>0.40</b> | -1530.732040 | <b>6.90</b> | -1071.723061 | <b>0.38</b> | -1071.713016 | <b>6.68</b> |
| 10  | -1530.742799 | 0.15        | -1530.735651 | 4.63        | -1071.723420 | 0.15        | -1071.716460 | 4.52        |
| 20  | -1530.743036 | <b>0.00</b> | -1530.738620 | 2.77        | -1071.723661 | <b>0.00</b> | -1071.719412 | 2.66        |
| 30  | -1530.742907 | 0.08        | -1530.740843 | 1.37        | -1071.723517 | 0.09        | -1071.721548 | 1.32        |
| 40  | -1530.742316 | 0.45        | -1530.742177 | 0.53        | -1071.722989 | 0.42        | -1071.722873 | 0.49        |
| 50  | -1530.741287 | 1.10        | -1530.742841 | 0.12        | -1071.721911 | 1.10        | -1071.723504 | 0.10        |
| 60  | -1530.739955 | 1.93        | -1530.743029 | <b>0.00</b> | -1071.720597 | 1.92        | -1071.723602 | <b>0.00</b> |
| 70  | -1530.738537 | 2.82        | -1530.742760 | 0.17        | -1071.719164 | 2.82        | -1071.723396 | 0.16        |
| 80  | -1530.737259 | 3.63        | -1530.742493 | 0.34        | -1071.717906 | 3.61        | -1071.723124 | 0.33        |
| 90  | -1530.736384 | 4.17        | -1530.742336 | <b>0.43</b> | -1071.717017 | 4.17        | -1071.722998 | <b>0.41</b> |
| 100 | -1530.735944 | <b>4.45</b> | -1530.742445 | 0.37        | -1071.716603 | <b>4.43</b> | -1071.723075 | 0.36        |
| 110 | -1530.735986 | 4.42        | -1530.742711 | 0.20        | -1071.716600 | 4.43        | -1071.723352 | 0.19        |
| 120 | -1530.739643 | 2.13        | -1530.743029 | <b>0.00</b> | -1071.720278 | 2.12        | -1071.723656 | <b>0.00</b> |
| 130 | -1530.741009 | 1.27        | -1530.742904 | 0.08        | -1071.721622 | 1.28        | -1071.723553 | 0.06        |

|        |                                     |                          |              |             |              |                                       |                    |                          |
|--------|-------------------------------------|--------------------------|--------------|-------------|--------------|---------------------------------------|--------------------|--------------------------|
| 140    | -1530.742092                        | 0.59                     | -1530.742320 | 0.44        | -1071.722752 | 0.57                                  | -1071.723021       | 0.40                     |
| 150    | -1530.742762                        | 0.17                     | -1530.741098 | 1.21        | -1071.723385 | 0.17                                  | -1071.721810       | 1.16                     |
| 160    | -1530.743036                        | <b>0.00</b>              | -1530.738914 | 2.58        | -1071.723661 | <b>0.00</b>                           | -1071.719720       | 2.47                     |
| 170    | -1530.742799                        | 0.15                     | -1530.735914 | 4.46        | -1071.723433 | 0.14                                  | -1071.716738       | 4.34                     |
| 180    | -1530.742395                        | 0.40                     | -1530.732391 | <b>6.68</b> | -1071.723044 | 0.39                                  | -1071.713396       | <b>6.44</b>              |
| Degree | $\theta_{11}(\text{C3-C2-C1'-C2'})$ |                          |              |             |              | $\theta_{12}(\text{C2-C3-C1''-C2''})$ |                    |                          |
|        | Compound 3<br>(au)                  | $\Delta E$<br>(kcal/mol) |              |             |              |                                       | Compound 4<br>(au) | $\Delta E$<br>(kcal/mol) |
| -180   | -1149.148565                        | <b>0.00</b>              |              |             |              |                                       | -1224.380416       | <b>2.75</b>              |
| -170   | -1149.092597                        | 0.06                     |              |             |              |                                       | -1224.381332       | 2.18                     |
| -160   | -1148.909979                        | 0.24                     |              |             |              |                                       | -1224.382857       | 1.22                     |
| -150   | -1148.523069                        | 0.63                     |              |             |              |                                       | -1224.384265       | 0.34                     |
| -140   | -1147.914680                        | 1.23                     |              |             |              |                                       | -1224.384799       | <b>0.00</b>              |
| -130   | -1147.091162                        | 2.06                     |              |             |              |                                       | -1224.384700       | 0.06                     |
| -120   | -1146.121446                        | 3.03                     |              |             |              |                                       | -1224.384085       | 0.45                     |
| -110   | -1145.151630                        | 4.00                     |              |             |              |                                       | -1224.383295       | 0.94                     |
| -100   | -1144.378281                        | 4.77                     |              |             |              |                                       | -1224.382613       | 1.37                     |
| -90    | -1144.132837                        | <b>5.02</b>              |              |             |              |                                       | -1224.382399       | <b>1.51</b>              |



|     |              |             |  |  |  |  |              |             |
|-----|--------------|-------------|--|--|--|--|--------------|-------------|
| -80 | -1144.406005 | 4.74        |  |  |  |  | -1224.382651 | 1.35        |
| -70 | -1145.127383 | 4.02        |  |  |  |  | -1224.383314 | 0.93        |
| -60 | -1146.044859 | 3.10        |  |  |  |  | -1224.384057 | 0.47        |
| -50 | -1146.993716 | 2.15        |  |  |  |  | -1224.384682 | 0.07        |
| -40 | -1147.804420 | 1.34        |  |  |  |  | -1224.384799 | <b>0.00</b> |
| -30 | -1148.406076 | 0.74        |  |  |  |  | -1224.384354 | 0.28        |
| -20 | -1148.785958 | 0.36        |  |  |  |  | -1224.383257 | 0.97        |
| -10 | -1148.964070 | 0.18        |  |  |  |  | -1224.381693 | 1.95        |
| 0   | -1149.148565 | <b>0.00</b> |  |  |  |  | -1224.380417 | <b>2.75</b> |
| 10  | -1148.964102 | 0.18        |  |  |  |  | -1224.381507 | 2.07        |
| 20  | -1148.785877 | 0.36        |  |  |  |  | -1224.383257 | 0.97        |
| 30  | -1148.406089 | 0.74        |  |  |  |  | -1224.384354 | 0.28        |
| 40  | -1147.804420 | 1.34        |  |  |  |  | -1224.384799 | <b>0.00</b> |
| 50  | -1146.993703 | 2.15        |  |  |  |  | -1224.384682 | 0.07        |
| 60  | -1146.044871 | 3.10        |  |  |  |  | -1224.384086 | 0.45        |
| 70  | -1145.118341 | 4.03        |  |  |  |  | -1224.383332 | 0.92        |
| 80  | -1144.392482 | 4.76        |  |  |  |  | -1224.382651 | 1.35        |
| 90  | -1144.132843 | <b>5.02</b> |  |  |  |  | -1224.382398 | <b>1.51</b> |

|     |              |             |  |  |  |  |              |             |
|-----|--------------|-------------|--|--|--|--|--------------|-------------|
| 100 | -1144.394603 | 4.75        |  |  |  |  | -1224.382613 | 1.37        |
| 110 | -1145.146460 | 4.00        |  |  |  |  | -1224.383279 | 0.95        |
| 120 | -1146.121440 | 3.03        |  |  |  |  | -1224.384057 | 0.47        |
| 130 | -1147.091155 | 2.06        |  |  |  |  | -1224.384700 | 0.06        |
| 140 | -1147.914680 | 1.23        |  |  |  |  | -1224.384799 | <b>0.00</b> |
| 150 | -1148.523032 | 0.63        |  |  |  |  | -1224.384265 | 0.34        |
| 160 | -1148.909948 | 0.24        |  |  |  |  | -1224.383068 | 1.09        |
| 170 | -1149.092616 | 0.06        |  |  |  |  | -1224.381505 | 2.07        |
| 180 | -1149.148565 | <b>0.00</b> |  |  |  |  | -1224.380416 | <b>2.75</b> |

**Table S3** Chemical reactivity indices obtained using DFT method in the studied mediums at B3LYP/6-311G(d,p) level of theory

| No | Medium   | $\eta$ (eV) | $\chi$ (eV) | $\mu$ (eV) | $\omega$ (eV) |            |            | Polarizability (au) | $E_{\text{HOMO}}$ (eV) | $E_{\text{LUMO}}$ (eV) |
|----|----------|-------------|-------------|------------|---------------|------------|------------|---------------------|------------------------|------------------------|
|    |          |             |             |            | $\omega$      | $\omega^-$ | $\omega^+$ |                     |                        |                        |
| 1  | Gas      | 2.004       | 3.566       | -3.566     | 3.172         | 5.206      | 1.640      | 394.760             | -5.570                 | -1.562                 |
|    | Water    | 1.984       | 3.669       | -3.669     | 3.393         | 5.476      | 1.806      | 525.107             | -5.653                 | -1.685                 |
|    | Methanol | 1.985       | 3.665       | -3.665     | 3.384         | 5.465      | 1.800      | 520.533             | -5.649                 | -1.680                 |
|    | Acetone  | 1.985       | 3.661       | -3.661     | 3.376         | 5.454      | 1.793      | 516.088             | -5.646                 | -1.676                 |
| 2  | Gas      | 2.107       | 3.449       | -3.449     | 2.823         | 4.811      | 1.362      | 247.853             | -5.556                 | -1.342                 |
|    | Water    | 2.105       | 3.568       | -3.568     | 3.023         | 5.071      | 1.503      | 339.324             | -5.673                 | -1.463                 |
|    | Methanol | 2.106       | 3.563       | -3.563     | 3.015         | 5.060      | 1.497      | 336.008             | -5.669                 | -1.458                 |
|    | Acetone  | 2.106       | 3.559       | -3.559     | 3.007         | 5.049      | 1.491      | 332.801             | -5.664                 | -1.453                 |
| 3  | Gas      | 1.995       | 3.522       | -3.522     | 3.109         | 5.119      | 1.597      | 323.816             | -5.517                 | -1.527                 |
|    | Water    | 1.977       | 3.648       | -3.648     | 3.365         | 5.436      | 1.788      | 425.582             | -5.625                 | -1.671                 |
|    | Methanol | 1.977       | 3.642       | -3.642     | 3.354         | 5.423      | 1.780      | 422.234             | -5.620                 | -1.665                 |
|    | Acetone  | 1.978       | 3.637       | -3.637     | 3.344         | 5.410      | 1.773      | 418.961             | -5.615                 | -1.659                 |
| 4  | Gas      | 2.068       | 3.688       | -3.688     | 3.288         | 5.390      | 1.703      | 294.364             | -5.756                 | -1.620                 |
|    | Water    | 2.052       | 3.758       | -3.758     | 3.441         | 5.576      | 1.819      | 395.357             | -5.810                 | -1.706                 |
|    | Methanol | 2.052       | 3.754       | -3.754     | 3.435         | 5.568      | 1.814      | 391.815             | -5.806                 | -1.702                 |
|    | Acetone  | 2.052       | 3.751       | -3.751     | 3.429         | 5.560      | 1.810      | 388.396             | -5.803                 | -1.699                 |

**Table S4** Condensed Fukui indices of studied compounds in the gaseous medium at B3LYP/6-311G(d,p) level of theory

| No    | 1       |         |         |              | 2       |         |         |              | 3       |         |         |              | 4       |         |         |              |
|-------|---------|---------|---------|--------------|---------|---------|---------|--------------|---------|---------|---------|--------------|---------|---------|---------|--------------|
|       | $f_i^+$ | $f_i^-$ | $f_i^o$ | $\Delta f_i$ | $f_i^+$ | $f_i^-$ | $f_i^o$ | $\Delta f_i$ | $f_i^+$ | $f_i^-$ | $f_i^o$ | $\Delta f_i$ | $f_i^+$ | $f_i^-$ | $f_i^o$ | $\Delta f_i$ |
| C-2   | 0.029   | 0.027   | 0.028   | 0.002        | 0.047   | 0.043   | 0.045   | 0.004        | 0.017   | 0.016   | 0.017   | 0.001        | 0.041   | 0.024   | 0.033   | 0.017        |
| C-3   | 0.033   | 0.022   | 0.028   | 0.011        | 0.040   | 0.046   | 0.043   | -0.006       | 0.051   | 0.042   | 0.047   | 0.009        | 0.011   | 0.013   | 0.012   | -0.002       |
| C-3a  | -0.012  | -0.003  | -0.008  | -0.009       | -0.001  | -0.003  | -0.002  | 0.002        | -0.021  | -0.009  | -0.015  | -0.012       | -0.013  | -0.009  | -0.011  | -0.004       |
| C-4   | 0.055   | 0.028   | 0.042   | 0.026        | 0.051   | 0.040   | 0.046   | 0.011        | 0.060   | 0.030   | 0.045   | 0.030        | 0.049   | 0.051   | 0.050   | -0.002       |
| C-5   | -0.003  | -0.006  | -0.005  | 0.003        | 0.009   | 0.014   | 0.012   | -0.005       | -0.005  | 0.159   | 0.077   | -0.164       | -0.002  | -0.002  | -0.002  | 0.000        |
| C-6   | 0.008   | 0.040   | 0.024   | -0.032       | 0.036   | 0.043   | 0.040   | -0.007       | 0.008   | 0.041   | 0.025   | -0.033       | 0.015   | 0.013   | 0.014   | 0.002        |
| C-7   | 0.038   | 0.022   | 0.030   | 0.015        | 0.046   | 0.029   | 0.038   | 0.017        | 0.041   | 0.025   | 0.033   | 0.016        | 0.033   | 0.034   | 0.034   | -0.001       |
| C-7a  | 0.010   | 0.034   | 0.022   | -0.024       | 0.002   | 0.016   | 0.009   | -0.014       | 0.013   | 0.038   | 0.026   | -0.025       | 0.032   | 0.019   | 0.026   | 0.013        |
| C-8   | 0.030   | 0.106   | 0.068   | -0.076       |         |         |         |              | 0.036   | 0.028   | 0.032   | 0.008        | 0.048   | 0.035   | 0.042   | 0.013        |
| C-9   | 0.035   | 0.031   | 0.033   | 0.004        |         |         |         |              | 0.038   | 0.034   | 0.036   | 0.004        | 0.053   | 0.043   | 0.048   | 0.010        |
| C-1'  | -0.001  | 0.006   | 0.003   | -0.007       | 0.003   | 0.011   | 0.007   | -0.008       | -0.001  | 0.005   | 0.002   | -0.006       |         |         |         |              |
| C-2'  | 0.021   | 0.019   | 0.020   | 0.002        | 0.036   | 0.029   | 0.033   | 0.007        | 0.020   | 0.022   | 0.021   | -0.002       |         |         |         |              |
| C-3'  | 0.012   | 0.021   | 0.017   | -0.009       | 0.016   | 0.030   | 0.023   | -0.014       | 0.015   | 0.020   | 0.018   | -0.005       |         |         |         |              |
| C-4'  | 0.029   | 0.019   | 0.024   | 0.010        | 0.044   | 0.027   | 0.036   | 0.017        | 0.030   | 0.021   | 0.026   | 0.009        |         |         |         |              |
| 4'-OH | 0.027   | 0.040   | -0.034  | -0.013       | 0.037   | 0.056   | -0.047  | -0.019       | 0.027   | 0.041   | -0.034  | -0.014       |         |         |         |              |
| C-5'  | 0.002   | 0.022   | 0.012   | -0.020       | 0.017   | 0.030   | 0.024   | -0.013       | 0.012   | 0.023   | 0.018   | -0.011       |         |         |         |              |
| C-6'  | 0.024   | 0.020   | 0.022   | 0.004        | 0.038   | 0.026   | 0.032   | 0.012        | 0.030   | 0.019   | 0.025   | 0.011        |         |         |         |              |
| C-1'' | -0.007  | -0.005  | -0.006  | -0.002       | -0.006  | -0.008  | -0.007  | 0.002        |         |         |         |              | 0.005   | 0.001   | 0.003   | 0.004        |

|         |        |        |        |        |       |       |       |        |        |        |        |        |        |        |        |        |
|---------|--------|--------|--------|--------|-------|-------|-------|--------|--------|--------|--------|--------|--------|--------|--------|--------|
| C-2"    | 0.005  | 0.003  | 0.004  | 0.002  | 0.006 | 0.010 | 0.008 | -0.004 |        |        |        |        | 0.015  | 0.018  | 0.017  | -0.003 |
| C-3"    | 0.001  | 0.001  | 0.001  | 0.000  | 0.002 | 0.001 | 0.001 | 0.001  |        |        |        |        | 0.003  | 0.004  | 0.004  | -0.001 |
| 3"-QH   | 0.029  | 0.008  | 0.019  | -0.021 | 0.025 | 0.026 | 0.026 | -0.001 |        |        |        |        | 0.018  | 0.028  | 0.023  | -0.010 |
| C-4"    | 0.025  | 0.022  | 0.024  | 0.003  | 0.038 | 0.040 | 0.039 | -0.002 |        |        |        |        | -0.195 | 0.037  | -0.079 | -0.232 |
| C-5"    | 0.018  | 0.019  | 0.019  | -0.001 | 0.025 | 0.328 | 0.177 | -0.303 |        |        |        |        | 0.018  | 0.020  | 0.019  | -0.002 |
| 5"-QH   | 0.003  | 0.002  | 0.002  | 0.001  | 0.005 | 0.004 | 0.004 | 0.001  |        |        |        |        | 0.003  | 0.001  | 0.002  | 0.002  |
| C-6"    | 0.000  | 0.002  | 0.001  | -0.002 | 0.013 | 0.012 | 0.013 | 0.001  |        |        |        |        | 0.000  | 0.012  | 0.006  | -0.012 |
| C-1'''  | -0.003 | -0.009 | -0.006 | 0.006  |       |       |       |        | -0.001 | -0.010 | -0.006 | 0.009  | -0.004 | -0.010 | -0.007 | 0.006  |
| C-2'''  | 0.030  | 0.026  | 0.028  | 0.004  |       |       |       |        | 0.034  | 0.031  | 0.033  | 0.003  | 0.042  | 0.037  | 0.040  | 0.005  |
| C-3'''  | 0.003  | 0.002  | 0.003  | 0.001  |       |       |       |        | 0.003  | 0.002  | 0.003  | 0.001  | 0.003  | 0.003  | 0.003  | 0.000  |
| 3'''-QH | 0.022  | 0.023  | 0.023  | -0.001 |       |       |       |        | 0.024  | 0.025  | 0.025  | -0.001 | 0.028  | 0.031  | 0.030  | -0.003 |
| C-4'''  | 0.045  | 0.048  | 0.047  | -0.003 |       |       |       |        | 0.050  | 0.055  | 0.053  | -0.005 | 0.058  | 0.070  | 0.064  | -0.012 |
| C-5'''  | 0.005  | 0.004  | 0.005  | 0.001  |       |       |       |        | 0.006  | 0.004  | 0.005  | 0.002  | 0.007  | 0.005  | 0.006  | 0.002  |
| 5'''-QH | 0.023  | 0.025  | 0.024  | -0.002 |       |       |       |        | 0.025  | 0.027  | 0.026  | -0.002 | 0.029  | 0.032  | 0.031  | -0.003 |
| C-6'''  | 0.024  | 0.027  | 0.026  | -0.003 |       |       |       |        | 0.026  | 0.030  | 0.028  | -0.004 | 0.031  | 0.039  | 0.035  | -0.008 |
